# Supplementary material for: Temporal trade-off between territorial and thermoregulatory behaviors of a generalist lizard in a dry forest
Source: Research Square preprint supplement (doi:10.21203/rs.3.rs-2895253/v1), 2023-06-06
Supplement: Supplementary file 1 [file db2718eb8641885d86be9377.xlsx]

## Sheet: Leyend
Column name	Complete name
LAT_DD	Latitude in decimal degrees
LONG_DD	Longitude in decimal degrees
ALTITUDE	Altitude in masl
VEGETATION_COVER	Percentage of vegetation cover
NUM_LIZ	Id of male lizard
NUM_INT_TOTAL	Total number of registered intervals
NUM_INT_SHADE_YES	Number of intervals during which the focal male occupied shady spots
NUM_INT_SHADE_NOT	Number of intervals during which the focal male occupied sunny spots
NUM_INT_PUSH_YES	Number of intervals during which the focal male performed push-ups
NUM_INT_PUSH_NOT	Number of intervals during which the focal male did not perform push-ups
NUM_INT_INTRUDER_YES	Number of intervals during which an intruder was within a 3m radius of the focal male
NUM_INT_INTRUDER_NOT	Number of intervals during which an intruder was not within a 3m radius of the focal male
TEMP_C	Microclimate temperature in °C

## Sheet: glm
LAT_DD	LONG_DD	ALTITUDE	VEGETATION_COVER	NUM_LIZ	NUM_INT_TOTAL	NUM_INT_SHADE_YES	NUM_INT_SHADE_NOT	NUM_INT_PUSH_YES	NUM_INT_PUSH_NOT	NUM_INT_INTRUDER_YES	NUM_INT_INTRUDER_NOT	TEMP_C
18.5853	-99.0997	1317.67	28.27	1	30	30	0	0	30	0	30	33.6525
18.6903	-98.9675	1317.67	44.19	3	22	22	0	0	22	0	22	34.8251
18.66	-98.9578	1295	51.07	9	30	25	5	1	29	0	30	30.885
18.695	-98.9622	1326	40.38	11	30	30	0	0	30	0	30	32.4159
18.7028	-98.9486	1385	60.21	12	20	20	0	0	20	0	20	30.3497
18.7017	-98.9411	1332	47.62	13	30	30	0	0	30	0	30	31.1766
18.6461	-98.9822	1312	49.72	14	30	30	0	0	30	0	30	31.519
18.64	-98.9861	1311	15.7	15	30	30	0	0	30	0	30	34.8535
18.6194	-98.9786	1389	32.88	16	26	24	2	0	26	0	26	34.7694
18.6519	-98.9986	1327	36.72	19	30	30	0	0	30	0	30	32.4254
18.6469	-98.9989	1523	27.3	20	30	26	4	7	23	4	26	35.5867
18.6578	-99.0092	1320	38.3	22	30	30	0	1	29	0	30	32.6458
18.6683	-98.9842	1317.67	64.24	24	30	30	0	0	30	0	30	29.7446
18.6139	-99.0222	1429	39.2	25	30	30	0	0	30	0	30	32.2788
18.6103	-99.0117	1255	37.13	26	30	25	5	5	25	2	28	33.9063
18.6164	-99.0097	1288	33.77	27	30	23	7	7	23	1	29	34.4552
18.6592	-99.0086	1264	60.64	28	30	30	0	0	30	0	30	29.6525
18.5997	-99.0044	1237	59.18	30	30	30	0	0	30	0	30	31.7384
18.6667	-98.9672	1313	26.51	31	24	0	24	4	20	0	24	36.2459
18.6597	-98.9631	1298	28.53	32	22	6	16	6	16	2	20	35.8762
18.6597	-98.9631	1298	24.66	33	24	4	20	14	10	5	19	36.3115
18.6819	-98.9394	1255	19.82	35	24	12	12	11	13	0	24	33.1861
18.6892	-98.9517	1304	45.53	37	30	24	6	0	30	0	30	31.4473
18.6411	-98.95	1266	33.8	38	30	0	30	16	14	0	30	34.1635
18.7017	-98.9786	1317	24.49	39	20	1	19	9	11	2	18	34.5726
18.7003	-98.9844	1319	41.43	40	21	0	21	4	17	0	21	32.8111
18.7206	-98.9856	1312	30.04	41	19	6	13	3	16	0	19	34.8556
18.6847	-98.9472	1311	25.9	43	27	0	27	9	18	0	27	33.1422
18.63	-99.0297	1308	21.94	44	30	0	30	4	26	0	30	33.825
18.6703	-98.9653	1308	41.47	46	28	4	24	6	22	0	28	32.3084
18.6492	-99.0083	1318	26.27	50	19	12	7	0	19	0	19	33.3432
18.7375	-98.9447	1314	46.865	54	25	21	4	5	20	0	25	30.8615
18.7439	-98.9642	1317	31.8	55	30	6	24	3	27	0	30	35.2374
18.7364	-98.9383	1305	37.34	57	30	17	13	8	22	0	30	31.7594
18.7183	-98.9408	1323	36.19	58	30	23	7	1	29	0	30	32.2618
18.7231	-98.9686	1304	39.07	60	30	0	30	10	20	0	30	32.123

## Sheet: glm_m
NUM_LIN	NUM_LAG	INTERVAL	SHADE_YES_1_NO_0	PUSH_YES_1_NOT_0
1	1	1	1	0
1	1	2	1	0
1	1	3	1	0
1	1	4	1	0
1	1	5	1	0
1	1	6	1	0
1	1	7	1	0
1	1	8	1	0
1	1	9	1	0
1	1	10	1	0
1	1	11	1	0
1	1	12	1	0
1	1	13	1	0
1	1	14	1	0
1	1	15	1	0
1	1	16	1	0
1	1	17	1	0
1	1	18	1	0
1	1	19	1	0
1	1	20	1	0
1	1	21	1	0
1	1	22	1	0
1	1	23	1	0
1	1	24	1	0
1	1	25	1	0
1	1	26	1	0
1	1	27	1	0
1	1	28	1	0
1	1	29	1	0
1	1	30	1	0
2	3	1	1	0
2	3	2	1	0
2	3	3	1	0
2	3	4	1	0
2	3	5	1	0
2	3	6	1	0
2	3	7	1	0
2	3	8	1	0
2	3	9	1	0
2	3	10
2	3	11
2	3	12
2	3	13
2	3	14
2	3	15
2	3	16
2	3	17
2	3	18	1	0
2	3	19	1	0
2	3	20	1	0
2	3	21	1	0
2	3	22	1	0
2	3	23	1	0
2	3	24	1	0
2	3	25	1	0
2	3	26	1	0
2	3	27	1	0
2	3	28	1	0
2	3	29	1	0
2	3	30	1	0
6	9	1	1	1
6	9	2	1	0
6	9	3	1	0
6	9	4	1	0
6	9	5	1	0
6	9	6	1	0
6	9	7	1	0
6	9	8	1	0
6	9	9	1	0
6	9	10	1	0
6	9	11	1	0
6	9	12	1	0
6	9	13	1	0
6	9	14	1	0
6	9	15	1	0
6	9	16	1	0
6	9	17	1	0
6	9	18	1	0
6	9	19	1	0
6	9	20	1	0
6	9	21	1	0
6	9	22	1	0
6	9	23	1	0
6	9	24	1	0
6	9	25	1	0
6	9	26	1	0
6	9	27	1	0
6	9	28	0	0
6	9	29	0	0
6	9	30	0	0
7	11	1	1	0
7	11	2	1	0
7	11	3	1	0
7	11	4	1	0
7	11	5	1	0
7	11	6	1	0
7	11	7	1	0
7	11	8	1	0
7	11	9	1	0
7	11	10	1	0
7	11	11	1	0
7	11	12	1	0
7	11	13	1	0
7	11	14	1	0
7	11	15	1	0
7	11	16	1	0
7	11	17	1	0
7	11	18	1	0
7	11	19	1	0
7	11	20	1	0
7	11	21	1	0
7	11	22	1	0
7	11	23	1	0
7	11	24	1	0
7	11	25	1	0
7	11	26	1	0
7	11	27	1	0
7	11	28	1	0
7	11	29	1	0
7	11	30	1	0
8	12	1	1	0
8	12	2	1	0
8	12	3	1	0
8	12	4	1	0
8	12	5	1	0
8	12	6	1	0
8	12	7	1	0
8	12	8	1	0
8	12	9	1	0
8	12	10	1	0
8	12	11	1	0
8	12	12	1	0
8	12	13	1	0
8	12	14	1	0
8	12	15	1	0
8	12	16	1	0
8	12	17	1	0
8	12	18	1	0
8	12	19	1	0
8	12	20	1	0
8	12	21
8	12	22
8	12	23
8	12	24
8	12	25
8	12	26
8	12	27
8	12	28
8	12	29
8	12	30
9	13	1	1	0
9	13	2	1	0
9	13	3	1	0
9	13	4	1	0
9	13	5	1	0
9	13	6	1	0
9	13	7	1	0
9	13	8	1	0
9	13	9	1	0
9	13	10	1	0
9	13	11	1	0
9	13	12	1	0
9	13	13	1	0
9	13	14	1	0
9	13	15	1	0
9	13	16	1	0
9	13	17	1	0
9	13	18	1	0
9	13	19	1	0
9	13	20	1	0
9	13	21	1	0
9	13	22	1	0
9	13	23	1	0
9	13	24	1	0
9	13	25	1	0
9	13	26	1	0
9	13	27	1	0
9	13	28	1	0
9	13	29	1	0
9	13	30	1	0
10	14	1	1	0
10	14	2	1	0
10	14	3	1	0
10	14	4	1	0
10	14	5	1	0
10	14	6	1	0
10	14	7	1	0
10	14	8	1	0
10	14	9	1	0
10	14	10	1	0
10	14	11	1	0
10	14	12	1	0
10	14	13	1	0
10	14	14	1	0
10	14	15	1	0
10	14	16	1	0
10	14	17	1	0
10	14	18	1	0
10	14	19	1	0
10	14	20	1	0
10	14	21	1	0
10	14	22	1	0
10	14	23	1	0
10	14	24	1	0
10	14	25	1	0
10	14	26	1	0
10	14	27	1	0
10	14	28	1	0
10	14	29	1	0
10	14	30	1	0
11	15	1	1	0
11	15	2	1	0
11	15	3	1	0
11	15	4	1	0
11	15	5	1	0
11	15	6	1	0
11	15	7	1	0
11	15	8	1	0
11	15	9	1	0
11	15	10	1	0
11	15	11	1	0
11	15	12	1	0
11	15	13	1	0
11	15	14	1	0
11	15	15	1	0
11	15	16	1	0
11	15	17	1	0
11	15	18	1	0
11	15	19	1	0
11	15	20	1	0
11	15	21	1	0
11	15	22	1	0
11	15	23	1	0
11	15	24	1	0
11	15	25	1	0
11	15	26	1	0
11	15	27	1	0
11	15	28	1	0
11	15	29	1	0
11	15	30	1	0
12	16	1	1	0
12	16	2	1	0
12	16	3	1	0
12	16	4	1	0
12	16	5	1	0
12	16	6	1	0
12	16	7	1	0
12	16	8	1	0
12	16	9	1	0
12	16	10	1	0
12	16	11	1	0
12	16	12	1	0
12	16	13	0	0
12	16	14	0	0
12	16	15	1	0
12	16	16	1	0
12	16	17	1	0
12	16	18	1	0
12	16	19	1	0
12	16	20	1	0
12	16	21	1	0
12	16	22	1	0
12	16	23	1	0
12	16	24	1	0
12	16	25	1	0
12	16	26	1	0
12	16	27
12	16	28
12	16	29
12	16	30
15	19	1	1	0
15	19	2	1	0
15	19	3	1	0
15	19	4	1	0
15	19	5	1	0
15	19	6	1	0
15	19	7	1	0
15	19	8	1	0
15	19	9	1	0
15	19	10	1	0
15	19	11	1	0
15	19	12	1	0
15	19	13	1	0
15	19	14	1	0
15	19	15	1	0
15	19	16	1	0
15	19	17	1	0
15	19	18	1	0
15	19	19	1	0
15	19	20	1	0
15	19	21	1	0
15	19	22	1	0
15	19	23	1	0
15	19	24	1	0
15	19	25	1	0
15	19	26	1	0
15	19	27	1	0
15	19	28	1	0
15	19	29	1	0
15	19	30	1	0
16	20	1	1	0
16	20	2	1	0
16	20	3	1	0
16	20	4	1	0
16	20	5	1	0
16	20	6	1	0
16	20	7	1	0
16	20	8	1	1
16	20	9	0	1
16	20	10	0	1
16	20	11	0	1
16	20	12	0	1
16	20	13	1	1
16	20	14	1	1
16	20	15	1	0
16	20	16	1	0
16	20	17	1	0
16	20	18	1	0
16	20	19	1	0
16	20	20	1	0
16	20	21	1	0
16	20	22	1	0
16	20	23	1	0
16	20	24	1	0
16	20	25	1	0
16	20	26	1	0
16	20	27	1	0
16	20	28	1	0
16	20	29	1	0
16	20	30	1	0
18	22	1	1	0
18	22	2	1	0
18	22	3	1	0
18	22	4	1	0
18	22	5	1	0
18	22	6	1	0
18	22	7	1	1
18	22	8	1	0
18	22	9	1	0
18	22	10	1	0
18	22	11	1	0
18	22	12	1	0
18	22	13	1	0
18	22	14	1	0
18	22	15	1	0
18	22	16	1	0
18	22	17	1	0
18	22	18	1	0
18	22	19	1	0
18	22	20	1	0
18	22	21	1	0
18	22	22	1	0
18	22	23	1	0
18	22	24	1	0
18	22	25	1	0
18	22	26	1	0
18	22	27	1	0
18	22	28	1	0
18	22	29	1	0
18	22	30	1	0
20	24	1	1	0
20	24	2	1	0
20	24	3	1	0
20	24	4	1	0
20	24	5	1	0
20	24	6	1	0
20	24	7	1	0
20	24	8	1	0
20	24	9	1	0
20	24	10	1	0
20	24	11	1	0
20	24	12	1	0
20	24	13	1	0
20	24	14	1	0
20	24	15	1	0
20	24	16	1	0
20	24	17	1	0
20	24	18	1	0
20	24	19	1	0
20	24	20	1	0
20	24	21	1	0
20	24	22	1	0
20	24	23	1	0
20	24	24	1	0
20	24	25	1	0
20	24	26	1	0
20	24	27	1	0
20	24	28	1	0
20	24	29	1	0
20	24	30	1	0
21	25	1	1	0
21	25	2	1	0
21	25	3	1	0
21	25	4	1	0
21	25	5	1	0
21	25	6	1	0
21	25	7	1	0
21	25	8	1	0
21	25	9	1	0
21	25	10	1	0
21	25	11	1	0
21	25	12	1	0
21	25	13	1	0
21	25	14	1	0
21	25	15	1	0
21	25	16	1	0
21	25	17	1	0
21	25	18	1	0
21	25	19	1	0
21	25	20	1	0
21	25	21	1	0
21	25	22	1	0
21	25	23	1	0
21	25	24	1	0
21	25	25	1	0
21	25	26	1	0
21	25	27	1	0
21	25	28	1	0
21	25	29	1	0
21	25	30	1	0
22	26	1	1	1
22	26	2	0	1
22	26	3	0	0
22	26	4	0	0
22	26	5	0	0
22	26	6	1	0
22	26	7	1	0
22	26	8	1	0
22	26	9	1	0
22	26	10	1	1
22	26	11	1	0
22	26	12	1	0
22	26	13	1	0
22	26	14	1	0
22	26	15	1	0
22	26	16	1	1
22	26	17	0	1
22	26	18	1	0
22	26	19	1	0
22	26	20	1	0
22	26	21	1	0
22	26	22	1	0
22	26	23	1	0
22	26	24	1	0
22	26	25	1	0
22	26	26	1	0
22	26	27	1	0
22	26	28	1	0
22	26	29	1	0
22	26	30	1	0
23	27	1	1	0
23	27	2	1	0
23	27	3	1	0
23	27	4	1	1
23	27	5	1	0
23	27	6	1	0
23	27	7	0	1
23	27	8	0	1
23	27	9	0	0
23	27	10	0	0
23	27	11	1	1
23	27	12	1	1
23	27	13	1	1
23	27	14	1	0
23	27	15	1	1
23	27	16	1	0
23	27	17	1	0
23	27	18	1	0
23	27	19	1	0
23	27	20	1	0
23	27	21	1	0
23	27	22	1	0
23	27	23	1	0
23	27	24	1	0
23	27	25	1	0
23	27	26	1	0
23	27	27	1	0
23	27	28	0	0
23	27	29	0	0
23	27	30	0	0
24	28	1	1	0
24	28	2	1	0
24	28	3	1	0
24	28	4	1	0
24	28	5	1	0
24	28	6	1	0
24	28	7	1	0
24	28	8	1	0
24	28	9	1	0
24	28	10	1	0
24	28	11	1	0
24	28	12	1	0
24	28	13	1	0
24	28	14	1	0
24	28	15	1	0
24	28	16	1	0
24	28	17	1	0
24	28	18	1	0
24	28	19	1	0
24	28	20	1	0
24	28	21	1	0
24	28	22	1	0
24	28	23	1	0
24	28	24	1	0
24	28	25	1	0
24	28	26	1	0
24	28	27	1	0
24	28	28	1	0
24	28	29	1	0
24	28	30	1	0
25	30	1	1	0
25	30	2	1	0
25	30	3	1	0
25	30	4	1	0
25	30	5	1	0
25	30	6	1	0
25	30	7	1	0
25	30	8	1	0
25	30	9	1	0
25	30	10	1	0
25	30	11	1	0
25	30	12	1	0
25	30	13	1	0
25	30	14	1	0
25	30	15	1	0
25	30	16	1	0
25	30	17	1	0
25	30	18	1	0
25	30	19	1	0
25	30	20	1	0
25	30	21	1	0
25	30	22	1	0
25	30	23	1	0
25	30	24	1	0
25	30	25	1	0
25	30	26	1	0
25	30	27	1	0
25	30	28	1	0
25	30	29	1	0
25	30	30	1	0
26	31	1	0	0
26	31	2	0	0
26	31	3	0	1
26	31	4	0	0
26	31	5	0	0
26	31	6	0	0
26	31	7	0	0
26	31	8	0	0
26	31	9	0	0
26	31	10
26	31	11
26	31	12
26	31	13	0	1
26	31	14	0	0
26	31	15	0	0
26	31	16	0	0
26	31	17	0	0
26	31	18	0	0
26	31	19	0	0
26	31	20	0	0
26	31	21	0	1
26	31	22	0	0
26	31	23	0	0
26	31	24	0	0
26	31	25	0	0
26	31	26	0	0
26	31	27	0	1
26	31	28
26	31	29
26	31	30
27	32	1	0	1
27	32	2	0	1
27	32	3	0	1
27	32	4	0	0
27	32	5	0	0
27	32	6	0	0
27	32	7	0	1
27	32	8	0	0
27	32	9	0	0
27	32	10	0	0
27	32	11	0	0
27	32	12	0	0
27	32	13	1	0
27	32	14	0	1
27	32	15	0	0
27	32	16	0	1
27	32	17	1	0
27	32	18	0	0
27	32	19	0	0
27	32	20	0	0
27	32	21
27	32	22
27	32	23
27	32	24
27	32	25
27	32	26
27	32	27	1	0
27	32	28	1	0
27	32	29	1	0
27	32	30	1	0
28	33	1	0	1
28	33	2	0	1
28	33	3	0	1
28	33	4	0	0
28	33	5	0	1
28	33	6	0	0
28	33	7	0	1
28	33	8
28	33	9
28	33	10
28	33	11
28	33	12	0	1
28	33	13	0	1
28	33	14
28	33	15
28	33	16	0	1
28	33	17	0	0
28	33	18	0	0
28	33	19	0	0
28	33	20	0	0
28	33	21	0	1
28	33	22	0	0
28	33	23	0	1
28	33	24	0	0
28	33	25	0	0
28	33	26	0	1
28	33	27	1	0
28	33	28	1	1
28	33	29	1	1
28	33	30	1	1
30	35	1	0	1
30	35	2	0	0
30	35	3	0	1
30	35	4	0	1
30	35	5	0	1
30	35	6	0	0
30	35	7
30	35	8
30	35	9
30	35	10
30	35	11
30	35	12	1	0
30	35	13	1	0
30	35	14	1	0
30	35	15	1	0
30	35	16
30	35	17	0	1
30	35	18	0	1
30	35	19	1	0
30	35	20	0	1
30	35	21	1	1
30	35	22	1	0
30	35	23	1	0
30	35	24	1	1
30	35	25	1	1
30	35	26	1	1
30	35	27	1	0
30	35	28	1	0
30	35	29	1	0
30	35	30	1	0
32	37	1	1	0
32	37	2	1	0
32	37	3	1	0
32	37	4	1	0
32	37	5	1	0
32	37	6	1	0
32	37	7	1	0
32	37	8	1	0
32	37	9	1	0
32	37	10	1	0
32	37	11	1	0
32	37	12	1	0
32	37	13	1	0
32	37	14	0	0
32	37	15	1	0
32	37	16	1	0
32	37	17	1	0
32	37	18	1	0
32	37	19	1	0
32	37	20	1	0
32	37	21	0	0
32	37	22	0	0
32	37	23	1	0
32	37	24	1	0
32	37	25	1	0
32	37	26	1	0
32	37	27	1	0
32	37	28	1	0
32	37	29	1	0
32	37	30	1	0
33	38	1	0	0
33	38	2	0	1
33	38	3	0	1
33	38	4	0	0
33	38	5	0	0
33	38	6	0	0
33	38	7	0	0
33	38	8	0	0
33	38	9	0	0
33	38	10	0	0
33	38	11	0	0
33	38	12	0	0
33	38	13	0	0
33	38	14	0	1
33	38	15	0	1
33	38	16	0	1
33	38	17	0	0
33	38	18	0	1
33	38	19	0	1
33	38	20	0	1
33	38	21	0	1
33	38	22	0	1
33	38	23	0	1
33	38	24	0	1
33	38	25	0	1
33	38	26	0	1
33	38	27	0	1
33	38	28	0	0
33	38	29	0	0
33	38	30	0	1
34	39	1	0	0
34	39	2	0	0
34	39	3	0	1
34	39	4	0	1
34	39	5	1	1
34	39	6	0	1
34	39	7
34	39	8
34	39	9
34	39	10
34	39	11
34	39	12
34	39	13
34	39	14
34	39	15
34	39	16
34	39	17	0	0
34	39	18	0	1
34	39	19	0	0
34	39	20	0	0
34	39	21	0	1
34	39	22	0	1
34	39	23	0	1
34	39	24	0	1
34	39	25	0	0
34	39	26	0	0
34	39	27	0	0
34	39	28	0	0
34	39	29	0	0
34	39	30	0	0
35	40	1	0	0
35	40	2	0	0
35	40	3	0	0
35	40	4	0	0
35	40	5	0	0
35	40	6	0	0
35	40	7	0	0
35	40	8	0	0
35	40	9	0	1
35	40	10	0	1
35	40	11	0	0
35	40	12	0	0
35	40	13	0	0
35	40	14	0	0
35	40	15	0	0
35	40	16	0	0
35	40	17	0	0
35	40	18	0	0
35	40	19	0	1
35	40	20	0	1
35	40	21	0	0
35	40	22
35	40	23
35	40	24
35	40	25
35	40	26
35	40	27
35	40	28
35	40	29
35	40	30
36	41	1	1	0
36	41	2	0	0
36	41	3	1	0
36	41	4
36	41	5	0	0
36	41	6	0	0
36	41	7	0	0
36	41	8	0	0
36	41	9	0	1
36	41	10
36	41	11	0	0
36	41	12	0	0
36	41	13	0	0
36	41	14	0	0
36	41	15	0	0
36	41	16	1	1
36	41	17	0	0
36	41	18
36	41	19
36	41	20
36	41	21
36	41	22
36	41	23
36	41	24
36	41	25	1	1
36	41	26
36	41	27	1	0
36	41	28
36	41	29	1	0
36	41	30
38	43	1	0	0
38	43	2	0	0
38	43	3	0	0
38	43	4	0	1
38	43	5	0	0
38	43	6	0	0
38	43	7	0	0
38	43	8	0	0
38	43	9	0	1
38	43	10	0	1
38	43	11	0	0
38	43	12	0	1
38	43	13	0	1
38	43	14	0	1
38	43	15
38	43	16
38	43	17	0	1
38	43	18	0	1
38	43	19
38	43	20	0	0
38	43	21	0	0
38	43	22	0	1
38	43	23	0	0
38	43	24	0	0
38	43	25	0	0
38	43	26	0	0
38	43	27	0	0
38	43	28	0	0
38	43	29	0	0
38	43	30	0	0
39	44	1	0	1
39	44	2	0	1
39	44	3	0	1
39	44	4	0	0
39	44	5	0	0
39	44	6	0	0
39	44	7	0	0
39	44	8	0	1
39	44	9	0	0
39	44	10	0	0
39	44	11	0	0
39	44	12	0	0
39	44	13	0	0
39	44	14	0	0
39	44	15	0	0
39	44	16	0	0
39	44	17	0	0
39	44	18	0	0
39	44	19	0	0
39	44	20	0	0
39	44	21	0	0
39	44	22	0	0
39	44	23	0	0
39	44	24	0	0
39	44	25	0	0
39	44	26	0	0
39	44	27	0	0
39	44	28	0	0
39	44	29	0	0
39	44	30	0	0
40	46	1	0	1
40	46	2	0	0
40	46	3	0	0
40	46	4	0	0
40	46	5	0	0
40	46	6
40	46	7	0	1
40	46	8	0	0
40	46	9	0	0
40	46	10	0	0
40	46	11	0	1
40	46	12	0	0
40	46	13	0	1
40	46	14	0	1
40	46	15	0	0
40	46	16	1	0
40	46	17	1	0
40	46	18	1	0
40	46	19	1	0
40	46	20	0	0
40	46	21	0	0
40	46	22	0	0
40	46	23
40	46	24	0	0
40	46	25	0	1
40	46	26	0	0
40	46	27	0	0
40	46	28	0	0
40	46	29	0	0
40	46	30	0	0
43	50	1	1	0
43	50	2	1	0
43	50	3	1	0
43	50	4	0	0
43	50	5	0	0
43	50	6	0	0
43	50	7	1	0
43	50	8	1	0
43	50	9	1	0
43	50	10
43	50	11
43	50	12
43	50	13	0	0
43	50	14	1	0
43	50	15	1	0
43	50	16	1	0
43	50	17	1	0
43	50	18	1	0
43	50	19	0	0
43	50	20	0	0
43	50	21	1	0
43	50	22	1	0
43	50	23
43	50	24
43	50	25
43	50	26
43	50	27
43	50	28
43	50	29
43	50	30
47	54	1	0	1
47	54	2	0	0
47	54	3	0	0
47	54	4	1	0
47	54	5	1	0
47	54	6	1	0
47	54	7	1	0
47	54	8	1	0
47	54	9	1	0
47	54	10	0	1
47	54	11	1	1
47	54	12	1	0
47	54	13	1	0
47	54	14	1	0
47	54	15	1	1
47	54	16	1	1
47	54	17	1	0
47	54	18	1	0
47	54	19	1	0
47	54	20	1	0
47	54	21	1	0
47	54	22	1	0
47	54	23	1	0
47	54	24	1	0
47	54	25	1	0
47	54	26
47	54	27
47	54	28
47	54	29
47	54	30
48	55	1	1	0
48	55	2	1	0
48	55	3	1	0
48	55	4	1	0
48	55	5	1	0
48	55	6	1	1
48	55	7	0	0
48	55	8	0	0
48	55	9	0	0
48	55	10	0	0
48	55	11	0	0
48	55	12	0	0
48	55	13	0	0
48	55	14	0	0
48	55	15	0	0
48	55	16	0	0
48	55	17	0	0
48	55	18	0	0
48	55	19	0	0
48	55	20	0	0
48	55	21	0	0
48	55	22	0	1
48	55	23	0	0
48	55	24	0	0
48	55	25	0	0
48	55	26	0	0
48	55	27	0	1
48	55	28	0	0
48	55	29	0	0
48	55	30	0	0
50	57	1	0	1
50	57	2	0	0
50	57	3	0	0
50	57	4	0	0
50	57	5	0	0
50	57	6	0	0
50	57	7	0	1
50	57	8	1	1
50	57	9	1	0
50	57	10	1	0
50	57	11	1	0
50	57	12	1	0
50	57	13	1	0
50	57	14	1	0
50	57	15	1	0
50	57	16	1	0
50	57	17	1	0
50	57	18	0	1
50	57	19	0	1
50	57	20	0	1
50	57	21	1	1
50	57	22	1	0
50	57	23	1	0
50	57	24	1	0
50	57	25	1	0
50	57	26	1	0
50	57	27	0	0
50	57	28	0	0
50	57	29	1	0
50	57	30	1	1
51	58	1	0	0
51	58	2	0	0
51	58	3	0	0
51	58	4	0	0
51	58	5	0	0
51	58	6	0	1
51	58	7	0	0
51	58	8	1	0
51	58	9	1	0
51	58	10	1	0
51	58	11	1	0
51	58	12	1	0
51	58	13	1	0
51	58	14	1	0
51	58	15	1	0
51	58	16	1	0
51	58	17	1	0
51	58	18	1	0
51	58	19	1	0
51	58	20	1	0
51	58	21	1	0
51	58	22	1	0
51	58	23	1	0
51	58	24	1	0
51	58	25	1	0
51	58	26	1	0
51	58	27	1	0
51	58	28	1	0
51	58	29	1	0
51	58	30	1	0
53	60	1	0	1
53	60	2	0	0
53	60	3	0	0
53	60	4	0	0
53	60	5	0	0
53	60	6	0	0
53	60	7	0	0
53	60	8	0	0
53	60	9	0	0
53	60	10	0	0
53	60	11	0	1
53	60	12	0	0
53	60	13	0	0
53	60	14	0	1
53	60	15	0	0
53	60	16	0	0
53	60	17	0	0
53	60	18	0	0
53	60	19	0	1
53	60	20	0	1
53	60	21	0	1
53	60	22	0	1
53	60	23	0	0
53	60	24	0	0
53	60	25	0	0
53	60	26	0	0
53	60	27	0	1
53	60	28	0	1
53	60	29	0	0
53	60	30	0	1
